# Supplementary material for: Impact of Soil Fertilized with Biomass Ash on Depth-Related Variability of Culturable Bacterial Diversity and Selected Physicochemical Parameters in Spring Barley Cultivation
Source: MDPI journal article supplement (doi:10.3390/ijerph192113721), 2022-10-22
Supplement: s1 [file s1]

**Table S1.** List of bacterial species identified using MALDI-TOF MS in the podzolic soils with a depth of 0 - 25 cm in April and August 2021 for the cultivation of spring barley. Control (without fertilization), NPK K<sub>2</sub>O in mineral fertilizers, P1–100 kg K<sub>2</sub>O ha<sup>-1</sup> in ash (0.5 t ha<sup>-1</sup> of ash in bulk weight), P2–200 kg K<sub>2</sub>O ha<sup>-1</sup> in ash (1.0 t ha<sup>-1</sup> of ash in bulk weight), P3–300 kg K<sub>2</sub>O ha<sup>-1</sup> in ash (1.5 t ha<sup>-1</sup> of ash in bulk weight), P4–400 kg K<sub>2</sub>O ha<sup>-1</sup> in ash (2.0 t ha<sup>-1</sup> of ash in bulk weight), P5–500 kg K<sub>2</sub>O ha<sup>-1</sup> in ash (2.5 t ha<sup>-1</sup> of ash in bulk weight).

| Taxa                                                            | Podzolic soil |       |       |     |       |       |     |       |       |     |       |       |     |       |       |     |       |       |        |       |       |         |       |       |     |       |       |     |       |       |     |       |       |     |       |       |    |  |  |    |  |  |
|-----------------------------------------------------------------|---------------|-------|-------|-----|-------|-------|-----|-------|-------|-----|-------|-------|-----|-------|-------|-----|-------|-------|--------|-------|-------|---------|-------|-------|-----|-------|-------|-----|-------|-------|-----|-------|-------|-----|-------|-------|----|--|--|----|--|--|
|                                                                 | April         |       |       |     |       |       |     |       |       |     |       |       |     |       |       |     |       |       | August |       |       |         |       |       |     |       |       |     |       |       |     |       |       |     |       |       |    |  |  |    |  |  |
|                                                                 | Control       |       |       | NPK |       |       | P1  |       |       | P2  |       |       | P3  |       |       | P4  |       |       | P5     |       |       | Control |       |       | NPK |       |       | P1  |       |       | P2  |       |       | P3  |       |       | P4 |  |  | P5 |  |  |
|                                                                 | 0-5           | 10-15 | 20-25 | 0-5 | 10-15 | 20-25 | 0-5 | 10-15 | 20-25 | 0-5 | 10-15 | 20-25 | 0-5 | 10-15 | 20-25 | 0-5 | 10-15 | 20-25 | 0-5    | 10-15 | 20-25 | 0-5     | 10-15 | 20-25 | 0-5 | 10-15 | 20-25 | 0-5 | 10-15 | 20-25 | 0-5 | 10-15 | 20-25 | 0-5 | 10-15 | 20-25 |    |  |  |    |  |  |
| <i>Arthrobacter globiformis</i>                                 |               |       |       |     |       |       |     |       |       |     |       |       |     | +     |       |     |       |       |        |       |       |         |       |       |     |       |       |     |       | +     |     |       | +     |     |       |       |    |  |  |    |  |  |
| <i>Bacillus amyloliquefaciens</i> ssp. <i>amyloliquefaciens</i> |               |       |       |     |       |       |     |       |       |     |       |       |     | +     |       |     |       |       |        |       |       |         |       |       |     |       |       |     |       | +     |     |       | +     |     |       |       |    |  |  |    |  |  |
| <i>Bacillus amyloliquefaciens</i> ssp. <i>plantarum</i>         |               |       |       |     |       |       |     |       |       |     |       |       |     | +     |       |     |       |       |        |       |       |         |       |       |     |       |       |     |       | +     |     |       | +     |     |       |       |    |  |  |    |  |  |
| <i>Bacillus cereus</i>                                          |               |       |       | +   | +     | +     |     | +     | +     | +   | +     | +     | +   | +     |       | +   | +     | +     | +      | +     |       | +       | +     | +     | +   | +     | +     | +   | +     | +     | +   | +     | +     | +   | +     | +     | +  |  |  |    |  |  |
| <i>Bacillus megaterium</i>                                      | +             | +     | +     | +   | +     | +     | +   | +     | +     | +   | +     |       |     | +     | +     | +   | +     | +     | +      |       | +     | +       | +     |       | +   | +     | +     | +   | +     | +     | +   | +     | +     | +   | +     | +     |    |  |  |    |  |  |
| <i>Bacillus mycoides</i>                                        |               |       |       |     |       |       |     | +     |       |     |       |       | +   |       | +     |     |       |       |        |       | +     | +       |       |       | +   | +     | +     |     | +     | +     | +   |       | +     |     |       |       |    |  |  |    |  |  |
| <i>Bacillus pseudomycoides</i>                                  |               |       |       |     |       |       |     |       |       |     |       |       |     |       |       | +   |       |       |        | +     |       |         |       | +     |     |       |       | +   |       |       |     |       | +     |     |       |       |    |  |  |    |  |  |
| <i>Bacillus thuringiensis</i>                                   |               |       |       |     |       |       |     |       |       |     |       | +     | +   |       |       | +   |       | +     | +      |       |       |         |       |       |     | +     |       | +   | +     |       | +   | +     |       |     | +     | +     |    |  |  |    |  |  |
| <i>Bacillus weihenstephanensis</i>                              |               |       |       |     |       |       |     |       |       |     |       | +     | +   |       |       |     |       |       |        |       | +     | +       |       |       |     |       | +     | +   |       | +     | +   |       | +     | +   |       |       |    |  |  |    |  |  |
| <i>Lysinibacillus fusiformis</i>                                |               |       |       |     |       |       |     |       | +     | +   | +     |       |     |       |       |     |       |       |        |       |       |         |       |       |     | +     | +     | +   | +     |       |     |       |       |     |       |       |    |  |  |    |  |  |
| <i>Paenibacillus amylolyticus</i>                               |               |       |       |     |       |       |     |       |       |     |       | +     |     |       |       |     |       |       |        |       |       |         |       |       |     | +     |       | +   |       | +     | +   |       |       |     |       |       |    |  |  |    |  |  |
| <i>Pseudarthrobacter oxydans</i>                                |               |       |       |     |       |       |     |       |       |     |       |       |     | +     | +     |     |       |       |        |       |       |         |       |       |     |       |       |     |       |       | +   |       |       | +   |       |       |    |  |  |    |  |  |

|                                                          |   |   |   |   |   |   |   |   |   |   |   |   |   |   |   |   |   |   |   |    |    |   |   |   |   |   |   |   |   |   |   |   |   |   |   |   |   |   |   |   |    |    |
|----------------------------------------------------------|---|---|---|---|---|---|---|---|---|---|---|---|---|---|---|---|---|---|---|----|----|---|---|---|---|---|---|---|---|---|---|---|---|---|---|---|---|---|---|---|----|----|
| <i>Pseudomonas brassicacearum</i>                        |   |   |   |   |   |   |   |   |   |   |   |   |   |   |   |   |   |   | + | +  |    |   |   |   |   |   |   |   |   |   |   |   |   |   |   |   |   |   | + | + |    |    |
| <i>Pseudomonas chlororaphis</i>                          |   |   |   |   |   |   |   |   |   |   |   |   |   |   |   |   |   | + |   | +  | +  |   |   |   |   |   |   | + | + |   |   |   |   |   |   |   |   |   |   | + | +  |    |
| <i>Pseudomonas chlororaphis</i> ssp. <i>aurantiaca</i>   |   |   |   |   |   |   |   |   |   |   |   |   |   |   |   |   |   |   |   | +  | +  |   |   |   |   |   |   |   |   |   |   |   |   |   |   |   |   |   |   |   | +  | +  |
| <i>Pseudomonas chlororaphis</i> ssp. <i>chlororaphis</i> |   |   |   |   |   |   |   |   |   |   |   |   |   |   |   |   |   |   |   |    | +  |   |   |   |   |   |   |   |   |   |   |   |   |   |   |   |   |   |   |   |    | +  |
| <i>Pseudomonas corrugata</i>                             |   |   |   |   |   |   |   |   |   |   |   |   |   |   |   |   |   |   |   |    | +  |   |   |   |   |   |   |   |   |   |   |   |   |   |   |   |   |   |   |   |    | +  |
| <i>Pseudomonas frederiksbergensis</i>                    |   |   |   | + |   |   |   |   |   |   |   |   |   |   |   | + |   |   |   |    | +  | + |   |   |   |   |   |   |   |   | + |   |   | + |   |   |   |   |   |   | +  |    |
| <i>Pseudomonas fuscovaginae</i>                          |   |   |   |   |   |   |   |   |   |   |   |   |   |   |   |   |   |   |   |    | +  |   |   |   |   |   |   |   |   |   |   |   |   |   |   |   |   |   |   |   |    | +  |
| <i>Pseudomonas jessenii</i>                              |   |   |   |   |   |   |   |   |   |   |   |   |   |   |   |   |   |   |   | +  |    |   |   |   |   |   |   |   |   |   |   |   |   |   |   |   |   |   | + |   |    |    |
| <i>Pseudomonas kilonensis</i>                            |   |   |   |   |   |   |   |   |   |   |   |   |   |   |   |   |   |   |   |    | +  |   |   |   |   |   |   |   |   |   |   |   |   |   |   |   |   |   |   |   |    | +  |
| <i>Pseudomonas mandelii</i>                              |   |   |   |   |   |   |   |   |   |   |   |   |   |   |   |   |   |   |   | +  |    |   |   |   |   |   |   |   |   |   |   |   |   |   |   |   |   |   | + | + |    |    |
| <i>Pseudomonas migulae</i>                               |   |   |   |   |   |   |   |   |   |   |   |   |   |   |   |   |   |   |   | +  |    |   |   |   |   |   |   |   |   |   |   |   |   |   |   |   |   |   | + | + |    |    |
| <i>Pseudomonas rhodesiae</i>                             |   |   |   |   |   |   |   |   |   |   |   |   |   |   |   |   |   |   |   |    | +  |   |   |   |   |   |   |   |   |   |   |   |   |   |   |   |   |   |   |   |    | +  |
| <i>Pseudomonas thivervalensis</i>                        |   |   |   |   |   |   |   |   |   |   |   |   |   |   |   |   |   |   |   | +  | +  |   |   |   |   |   |   |   |   |   |   |   |   |   |   |   |   |   | + | + |    |    |
| <i>Pseudomonas vancouverensis</i>                        |   |   |   |   |   |   |   |   |   |   |   |   |   |   |   |   |   |   |   |    | +  |   |   |   |   |   |   |   |   |   |   |   |   |   |   |   |   |   |   |   |    | +  |
| <i>Staphylococcus aureus</i>                             |   |   |   |   |   |   |   |   |   |   |   |   |   |   |   |   |   |   |   |    | +  |   |   |   |   |   |   |   |   |   |   |   |   |   |   |   |   |   |   |   |    | +  |
| <i>Staphylococcus aureus</i> ssp. <i>aureus</i>          |   |   |   |   |   |   |   |   |   |   |   |   |   |   |   |   |   |   |   |    | +  |   |   |   |   |   |   |   |   |   |   |   |   |   |   |   |   |   |   |   |    | +  |
| Total                                                    | 1 | 1 | 1 | 3 | 2 | 2 | 1 | 2 | 4 | 3 | 3 | 2 | 4 | 6 | 4 | 3 | 4 | 4 | 2 | 10 | 15 | 1 | 1 | 1 | 6 | 5 | 1 | 2 | 5 | 3 | 4 | 6 | 3 | 5 | 7 | 5 | 4 | 7 | 6 | 2 | 10 | 17 |

**Table S2.** List of bacterial species identified using MALDI-TOF MS in the chernozem soil with a depth of 0 - 25 cm in April and August 2021 for the cultivation of spring barley. Control (without fertilization), NPK K<sub>2</sub>O in mineral fertilizers, C1–100 kg K<sub>2</sub>O ha<sup>-1</sup> in ash (0.5 t ha<sup>-1</sup> of ash in bulk weight), C2–200 kg K<sub>2</sub>O ha<sup>-1</sup> in ash (1.0 t ha<sup>-1</sup> of ash in bulk weight), C3–300 kg K<sub>2</sub>O ha<sup>-1</sup> in ash (1.5 t ha<sup>-1</sup> of ash in bulk weight), C4–400 kg K<sub>2</sub>O ha<sup>-1</sup> in ash (2.0 t ha<sup>-1</sup> of ash in bulk weight), C5–500 kg K<sub>2</sub>O ha<sup>-1</sup> in ash (2.5 t ha<sup>-1</sup> of ash in bulk weight).

[illegible]

|                                                          |   |   |   |   |   |   |   |   |    |   |   |   |   |   |    |    |    |    |   |   |    |   |   |   |   |   |   |   |   |    |   |   |   |   |   |    |    |    |    |   |    |    |
|----------------------------------------------------------|---|---|---|---|---|---|---|---|----|---|---|---|---|---|----|----|----|----|---|---|----|---|---|---|---|---|---|---|---|----|---|---|---|---|---|----|----|----|----|---|----|----|
| <i>Pseudomonas caricapapayae</i>                         |   |   |   |   |   |   |   |   |    |   |   |   |   |   |    |    | +  |    |   |   |    |   |   |   |   |   |   |   |   |    |   |   |   |   |   | +  | +  |    |    |   |    |    |
| <i>Pseudomonas chlororaphis</i>                          |   |   |   |   |   |   | + |   |    |   | + |   |   |   |    |    |    |    |   |   |    |   |   |   | + |   |   | + |   |    | + |   |   |   |   |    |    |    |    |   |    |    |
| <i>Pseudomonas chlororaphis</i> ssp. <i>aurantiaca</i>   |   |   |   |   |   |   |   |   | +  |   |   |   |   |   |    |    | +  |    |   |   |    |   |   |   |   |   |   | + |   |    |   |   |   |   |   | +  |    |    |    |   |    |    |
| <i>Pseudomonas chlororaphis</i> ssp. <i>chlororaphis</i> |   |   |   |   |   |   |   |   | +  |   |   |   |   |   |    |    | +  |    |   |   |    |   |   |   |   |   |   | + |   |    |   |   |   |   |   | +  |    |    |    |   |    |    |
| <i>Pseudomonas corrugata</i>                             |   |   |   |   |   |   | + |   |    |   |   |   |   |   |    |    | +  |    |   |   | +  |   |   |   |   |   |   | + |   |    | + |   |   |   | + |    |    |    | +  | + |    |    |
| <i>Pseudomonas extremorientalis</i>                      | + |   |   |   |   |   |   |   |    |   |   |   |   |   |    |    |    |    |   |   | +  |   |   |   |   |   |   |   |   |    |   |   |   |   |   |    |    |    |    |   |    |    |
| <i>Pseudomonas frederiksbergensis</i>                    |   |   |   |   |   |   |   |   | +  |   |   |   |   | + | +  | +  | +  |    |   |   |    |   |   |   |   |   |   | + |   |    |   |   | + | + | + | +  | +  |    | +  |   |    |    |
| <i>Pseudomonas fuscovaginae</i>                          |   |   |   |   |   |   |   |   |    |   |   |   |   |   |    |    |    |    |   |   |    |   |   |   |   |   |   |   |   |    |   |   |   |   |   |    |    |    |    |   |    |    |
| <i>Pseudomonas gessardii</i>                             |   |   |   |   |   |   |   |   |    |   |   |   |   |   | +  |    |    |    |   |   |    |   |   |   |   |   |   |   |   |    |   |   |   |   |   | +  |    |    |    |   |    |    |
| <i>Pseudomonas graminis</i>                              |   |   |   |   |   |   |   |   |    |   |   |   |   |   |    |    | +  |    |   |   |    |   |   |   |   |   |   |   |   |    |   |   |   |   |   | +  |    |    |    |   |    |    |
| <i>Pseudomonas jessenii</i>                              |   |   |   |   |   |   |   |   | +  |   |   |   |   |   | +  |    |    | +  |   |   |    |   |   |   |   |   |   | + |   |    |   |   |   |   | + |    |    | +  |    |   |    |    |
| <i>Pseudomonas kilonensis</i>                            |   |   |   |   |   |   |   |   | +  |   |   |   |   |   |    |    | +  | +  |   |   |    |   |   |   |   |   |   | + |   |    |   |   |   |   | + | +  | +  | +  |    |   |    |    |
| <i>Pseudomonas koreensis</i>                             |   |   |   |   |   |   | + |   |    |   | + |   |   |   |    |    | +  |    |   |   |    |   |   |   |   |   | + |   |   | +  |   |   | + | + |   | +  | +  |    |    |   |    |    |
| <i>Pseudomonas libanensis</i>                            | + |   |   |   |   |   |   |   |    |   |   |   |   |   |    |    |    |    |   |   | +  | + |   |   |   |   |   |   |   |    |   |   |   |   |   |    |    |    |    | + | +  |    |
| <i>Pseudomonas mandelii</i>                              |   |   |   |   |   |   |   |   | +  |   |   |   |   |   |    |    |    |    |   |   |    |   |   |   |   |   | + |   |   |    |   |   |   |   |   | +  |    |    |    |   |    |    |
| <i>Pseudomonas migulae</i>                               |   |   |   |   |   |   |   |   |    |   |   |   |   |   |    |    |    |    |   |   | +  |   |   |   |   |   |   |   |   |    |   |   |   |   |   |    |    |    |    | + | +  |    |
| <i>Pseudomonas orientalis</i>                            |   |   |   |   |   |   |   |   |    |   |   |   |   |   |    |    | +  |    |   |   |    |   |   |   |   |   |   |   |   |    |   |   |   |   |   |    | +  |    | +  |   |    |    |
| <i>Pseudomonas protegens</i>                             |   |   |   |   |   |   |   |   |    |   |   |   |   |   |    |    |    |    |   |   | +  |   |   |   |   |   |   |   |   |    |   |   |   |   |   |    |    |    |    | + | +  |    |
| <i>Pseudomonas proteolytica</i>                          |   |   |   |   |   |   | + |   |    |   |   |   |   |   | +  |    |    |    |   |   |    |   |   |   |   | + |   |   |   |    |   |   |   |   | + |    |    |    |    |   |    |    |
| <i>Pseudomonas rhodesiae</i>                             |   |   |   |   |   |   |   |   |    |   |   |   |   |   |    |    |    |    |   |   | +  |   |   |   |   |   |   |   |   |    |   |   |   |   |   |    |    |    |    | + | +  |    |
| <i>Pseudomonas thivervalensis</i>                        |   |   |   |   |   |   |   |   | +  |   |   |   |   |   | +  |    | +  |    | + | + |    |   |   |   |   |   | + |   |   |    |   |   | + |   |   | +  |    | +  | +  |   |    |    |
| <i>Pseudomonas trivialis</i>                             |   |   |   |   |   |   |   |   |    |   |   |   |   |   |    |    |    |    |   |   |    |   |   |   |   |   | + |   |   |    |   |   |   |   |   |    |    |    |    |   |    |    |
| <i>Pseudomonas vancouverensis</i>                        |   |   |   |   |   |   |   |   | +  |   |   |   |   |   | +  |    | +  |    |   |   |    |   |   |   |   | + |   |   |   |    |   |   |   | + |   |    |    |    |    |   |    |    |
| <i>Rhodococcus erythropolis</i>                          |   |   |   |   |   |   |   |   |    |   |   |   |   |   |    | +  |    |    |   |   |    |   |   |   |   |   |   |   |   |    |   |   |   |   |   | +  |    |    |    |   |    |    |
| Total                                                    | 2 | 1 | 1 | 1 | 1 | 1 | 6 | 1 | 11 | 4 | 4 | 5 | 2 | 3 | 12 | 10 | 14 | 13 | 5 | 4 | 11 | 3 | 1 | 1 | 2 | 1 | 1 | 7 | 2 | 13 | 5 | 6 | 6 | 4 | 5 | 15 | 12 | 17 | 15 | 7 | 13 | 13 |
